# Supplementary material
Source: HighWire-hosted journal article supplement (https://www.qdcxjkg.com/highwire/filestream/113104/field_highwire_adjunct_files/1/Online_supplement_Table_6.pdf)
Supplement: Online_supplement_Table_6.pdf [file Online_supplement_Table_6.pdf]

**Table 6 Atopic status of children with current asthma and persistent wheeze**

| <b>Characteristic</b>    | <b>Not atopic</b> | <b>Atopic by 2years</b> | <b>Atopic after 2years</b> |
|--------------------------|-------------------|-------------------------|----------------------------|
|                          | N (%)             | N (%)                   | N (%)                      |
| Current asthma (N=27)    | 3 (11.1)          | 18 (66.7)               | 6(22.2)                    |
| Persistent wheeze (N=30) | 5 (16.6)          | 20 (66.7)               | 5 (16.7)                   |
